# Supplementary material
Source: MDPI journal article supplement (https://www.mdpi.com/1099-4300/25/10/1390)
Supplement: s1 [file s1]

# Supplementary Material

## 1. Table of Notations

The definition of some notations used in this paper are summarized in table S1.

Table S1: Notations used in this paper.

| Notations     | Description                                     |
|---------------|-------------------------------------------------|
| $\mathcal{H}$ | A hypergraph                                    |
| $V$           | The node set of $\mathcal{H}$                   |
| $E$           | The hyperedge set of $\mathcal{H}$              |
| $n$           | The number of nodes in $\mathcal{H}$            |
| $m$           | The number of hyperedges in $\mathcal{H}$       |
| $C$           | The incidence matrix of $\mathcal{H}$           |
| $A$           | The adjacency matrix of $\mathcal{H}$           |
| $D$           | The hyperdegree matrix of $\mathcal{H}$         |
| $B$           | The hyperedge adjacency matrix of $\mathcal{H}$ |
| $D_e$         | The hyperedge degree matrix of $\mathcal{H}$    |

## 2. More experiments results

This section contains the extra result of the experiment, which contains the statistical indicators of the networks and the epidemic spreading result under various initial infected nodes.

### 2.1. Statistics

The results of statistics of three datasets Algebra, Bars-Rev and iJO1366 are shown in figure S1, figure S2 and figure S3.

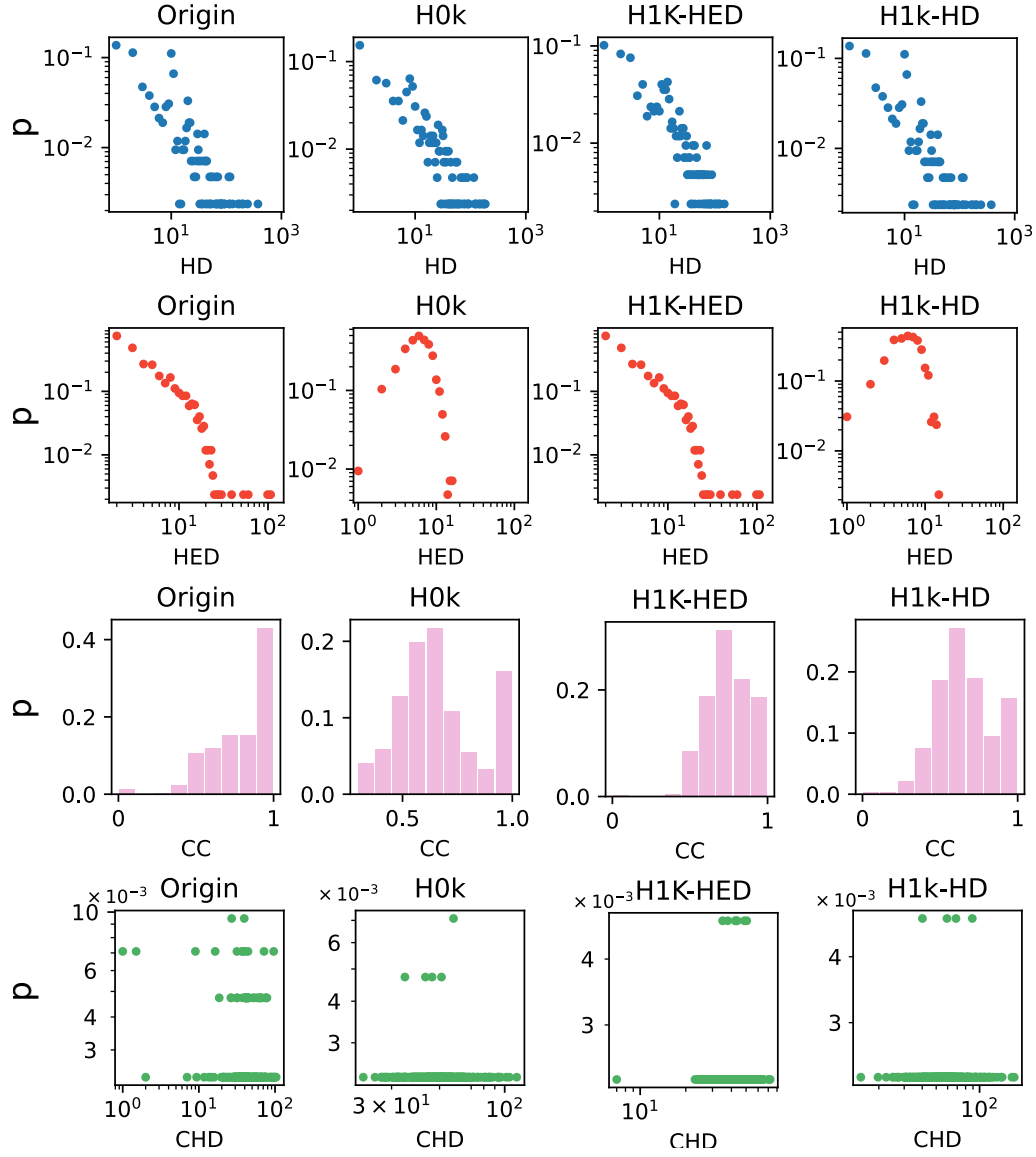

Figure S1: **Statistical indices of network Algebra and its hull models.** The x-axis in four rows from top to bottom represents the distribution of hyperdegree (HD), hyperedge degree (HED), clustering coefficient (CC) and co-average hyperdegree (CHD).

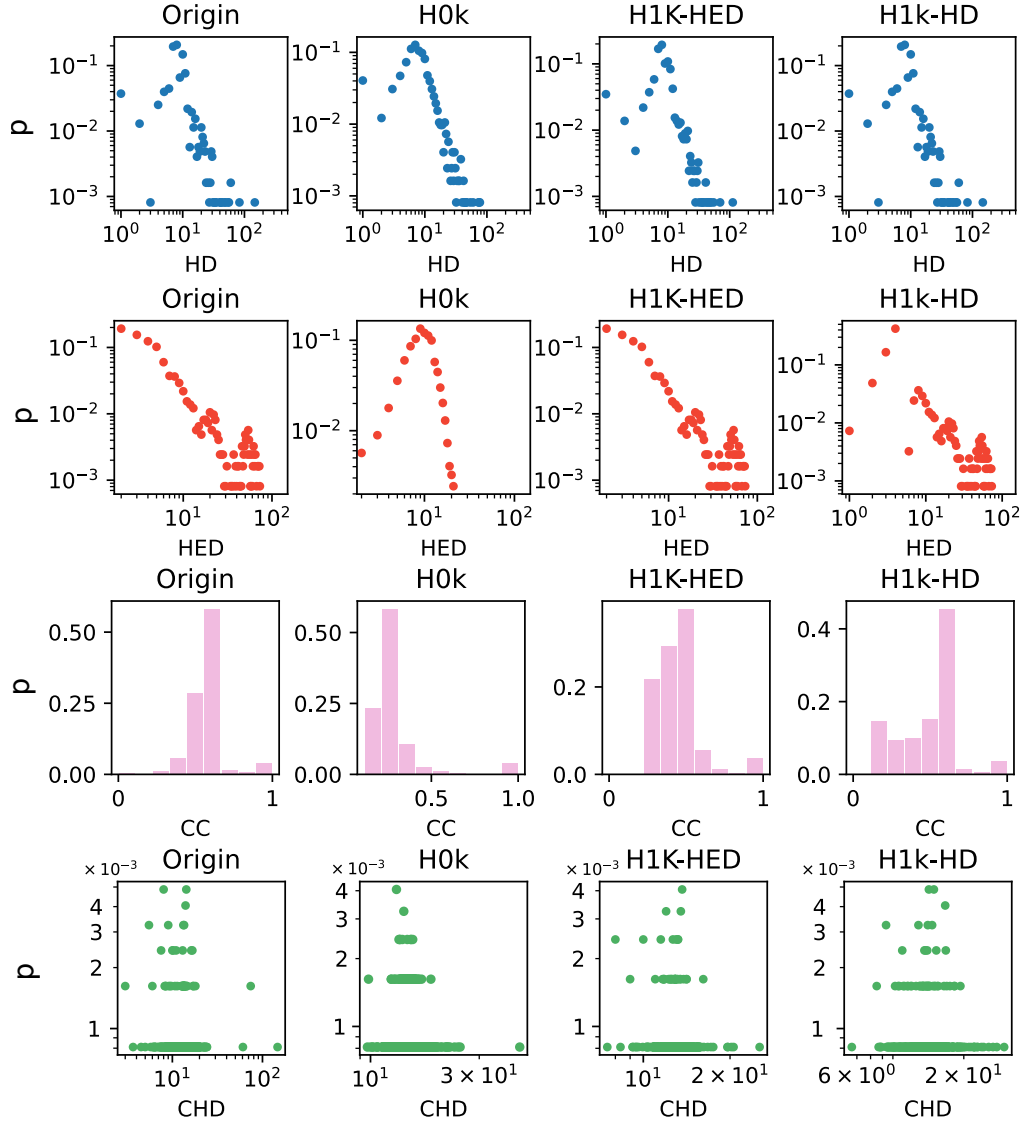

Figure S2: **Statistical indices of network Bars-Rev and its hull models.** The x-axis in four rows from top to bottom represents the distribution of hyperdegree (HD), hyperedge degree (HED), clustering coefficient (CC) and co-average hyperdegree (CHD).

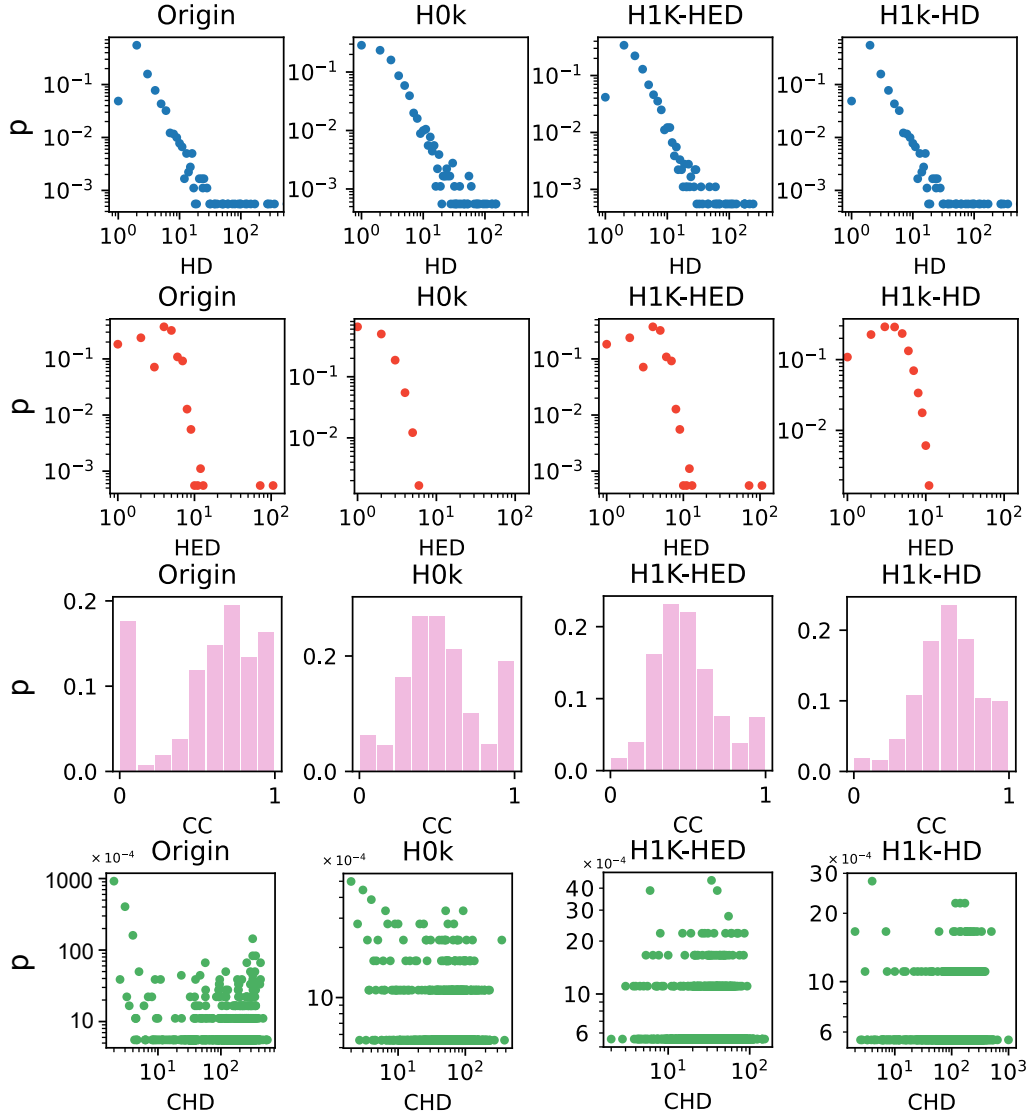

Figure S3: **Statistical indices of network iJO1366 and its hull models.** The x-axis in four rows from top to bottom represents the distribution of hyperdegree (HD), hyperedge degree (HED), clustering coefficient (CC) and co-average hyperdegree (CHD).

## 2.2. Epidemic Spreading

These section contains the results of epidemic spreading under 2% initial infected nodes in figure S4 and 5% initial infected nodes in figure S5.

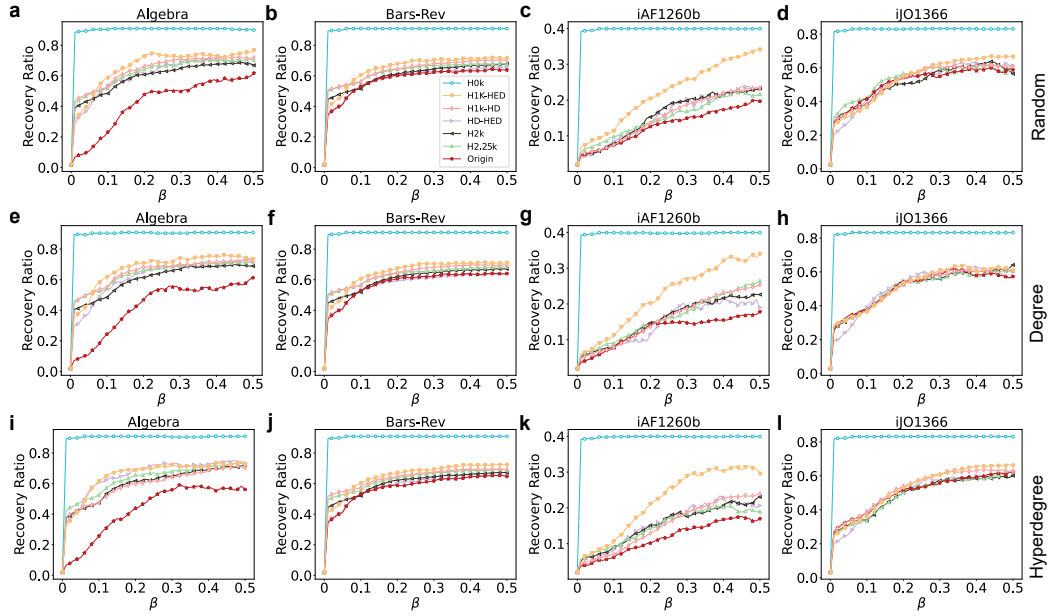

Figure S4: **The SIR epidemic contagion under 2% initial infected nodes on four datasets with different infection rate  $\beta$ .** The first (a-d), second (e-h), and third (i-l) row denotes the epidemic results on 2% initial infected nodes picked by random, degree, hyperdegree. The x-axis represents the different infection rates  $\beta$  and the y-axis denotes the recovery number ratio at the steady state.

Table S2: The recovery proportion of each dataset under  $\beta = 0.3$

|          | Origin | H0k  | H1k-HED | H1k-HD | HD-HED | H2K  | H2.5k |
|----------|--------|------|---------|--------|--------|------|-------|
| Algebra  | 0.40   | 0.83 | 0.63    | 0.58   | 0.55   | 0.51 | 0.53  |
| Bars-Rev | 0.55   | 0.83 | 0.64    | 0.61   | 0.59   | 0.58 | 0.56  |
| iAF1260b | 0.08   | 0.20 | 0.12    | 0.09   | 0.09   | 0.09 | 0.12  |
| iJO1366  | 0.43   | 0.66 | 0.42    | 0.44   | 0.44   | 0.46 | 0.45  |

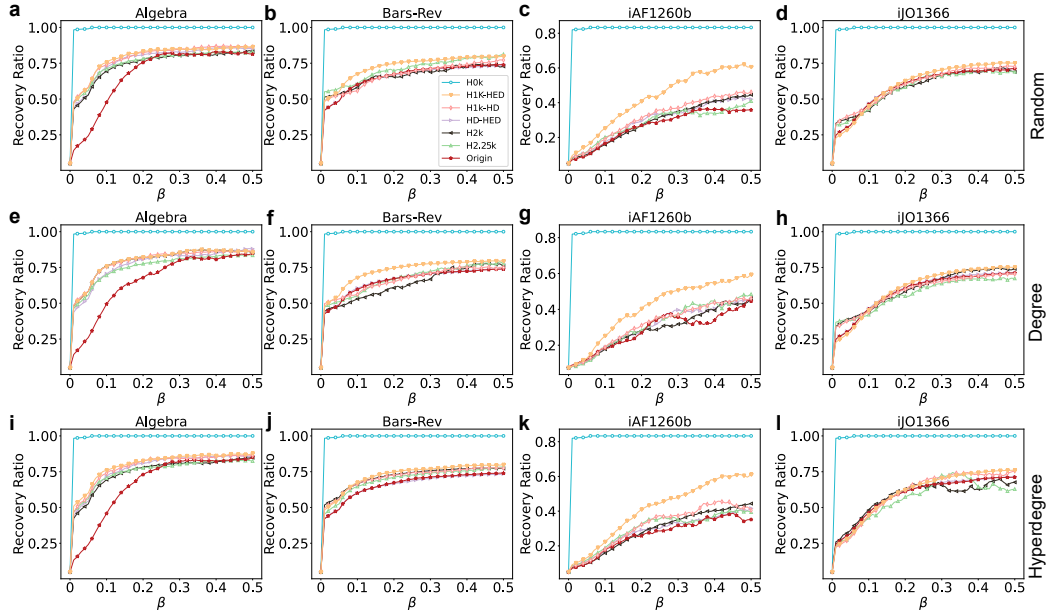

Figure S5: **The SIR epidemic contagion under 5% initial infected nodes on four datasets with different infection rate  $\beta$ .** The first (a-d), second (e-h), and third (i-l) row denotes the epidemic results on 5% initial infected nodes picked by random, degree, hyperdegree. The x-axis represents the different infection rates  $\beta$  and the y-axis denotes the recovery number ratio at the steady state.

In order to explore the spread of different datasets at the same infection rate, we counted the proportion of R state nodes when reaching the steady state in the case of  $\beta = 0.3$  in table S2 and  $\beta = 0.5$  in table S3.

Table S3: The recovery proportion of each dataset under  $\beta = 0.5$

|          | Origin | H0k  | H1k-HED | H1k-HD | HD-HED | H2K  | H2.5k |
|----------|--------|------|---------|--------|--------|------|-------|
| Algebra  | 0.43   | 0.83 | 0.62    | 0.62   | 0.58   | 0.55 | 0.61  |
| Bars-Rev | 0.60   | 0.83 | 0.65    | 0.63   | 0.59   | 0.62 | 0.60  |
| iAF1260b | 0.12   | 0.20 | 0.15    | 0.13   | 0.13   | 0.11 | 0.12  |
| iJO1366  | 0.47   | 0.66 | 0.52    | 0.50   | 0.47   | 0.50 | 0.45  |
